# Supplementary material
Source: HighWire-hosted journal article supplement (http://www.qdcxjkg.com/highwire/filestream/113531/field_highwire_adjunct_files/0/ERJ-00722-2012_Disclosures.pdf)
Supplement: ERJ-00722-2012_Disclosures.pdf [file ERJ-00722-2012_Disclosures.pdf]

**G.B Jensen** has been an investigator in studies supported by Johnson&Johnson, Glaxo-SKF, Astra-Zeneca, Roche. Grants resulting from this activity are paid into the Hospital Research Foundation.

**P. Lange** has received research grants from GlaxoSmithKline, Boehringer Ingelheim and Pfizer; received fees for speaking from AstraZeneca, Pfizer, Boehringer Ingelheim, GlaxoSmithCline, Nycomed, Novartis; received fees for consulting from AstraZeneca, Pfizer, Boehringer Ingelheim, GlaxoSmithCline, Nycomed, Novartis, Allmirall and Mundipharma.

**J. Vestbo** in the mid-1980's received an unconditional research grant of DKK 276,000 from a charity foundation (Skandinavisk Tobakskompagnis Gavefond) that receives its income from the Scandinavian Tobacco Company.
